# Supplementary material for: A green solvent engineering process for synthesizing perovskite films in high humidity atmospheres for efficient solar cells
Source: Royal Society of Chemistry journal article supplement (doi:10.1039/d3tc04358d), 2024-01-01
Supplement: d3tc04358d1.pdf [file d3tc04358d1.pdf]

## Supporting Information

# All green solvent engineering processed perovskite films for efficient solar cells in high humid atmosphere

Xiaobing Cao<sup>1,2\*a</sup>, Gengyang Su<sup>1a</sup>, Lei Hao<sup>1</sup>, Jian Zhou<sup>1</sup>, Qingguang Zeng<sup>1</sup>, Xin He<sup>1\*</sup>,

Jinquan Wei<sup>3\*</sup>

1. School of Applied Physics and Materials, Wuyi University, Jiangmen, Guangdong 529020,  
P.R. China
2. Institute of Carbon Peaking and Carbon Neutralization, Wuyi University, Jiangmen,  
Guangdong 529020, P.R. China
3. State Key Lab of New Ceramics and Fine Processing; Education Ministry Key Laboratory  
for Advanced Materials Processing Technology; School of Materials Science and  
Engineering, Tsinghua University, Beijing, China, 100084

\*Corresponding Authors. Corresponding Authors. E-mail: [caoxb14@tsinghua.org.cn](mailto:caoxb14@tsinghua.org.cn);  
[hexinwyu@126.com](mailto:hexinwyu@126.com); [jqwei@tsinghua.edu.cn](mailto:jqwei@tsinghua.edu.cn). Tel: +86-10-62781065.

a: these authors contribute equally to this work.

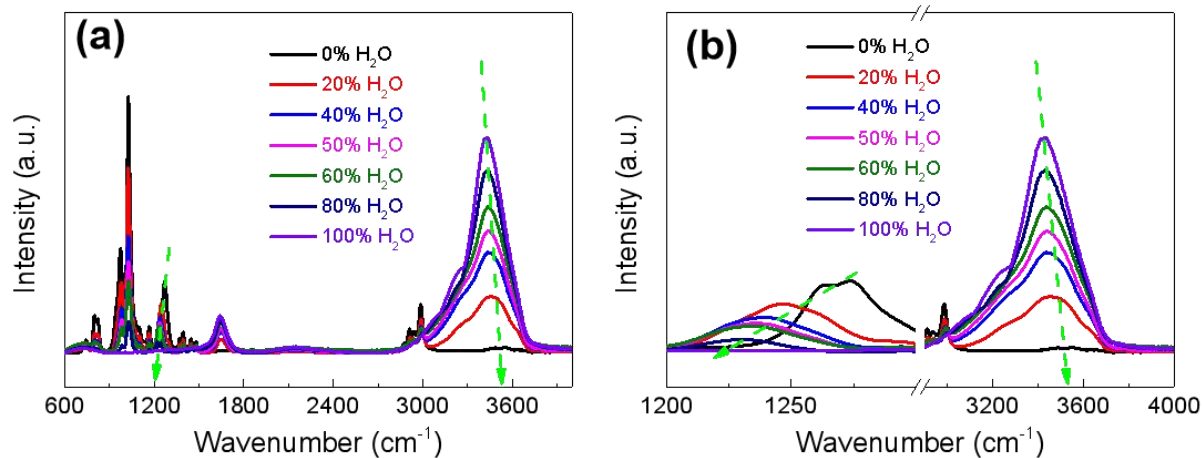

**Figure S1** The comparison of FTIR spectra of different solvent system of TEP+  $x$  % H<sub>2</sub>O ( $x=0\sim 100$ ). (a) the full spectra; (b) the enlarged spectra.

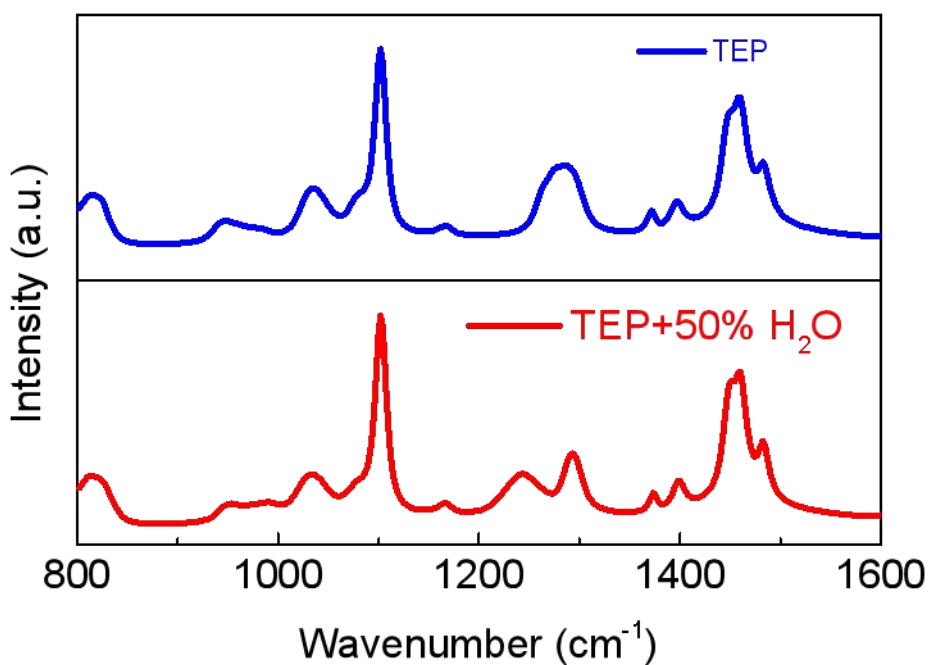

**Figure S2** The full Raman spectra of pure TEP and TEP+50% H<sub>2</sub>O

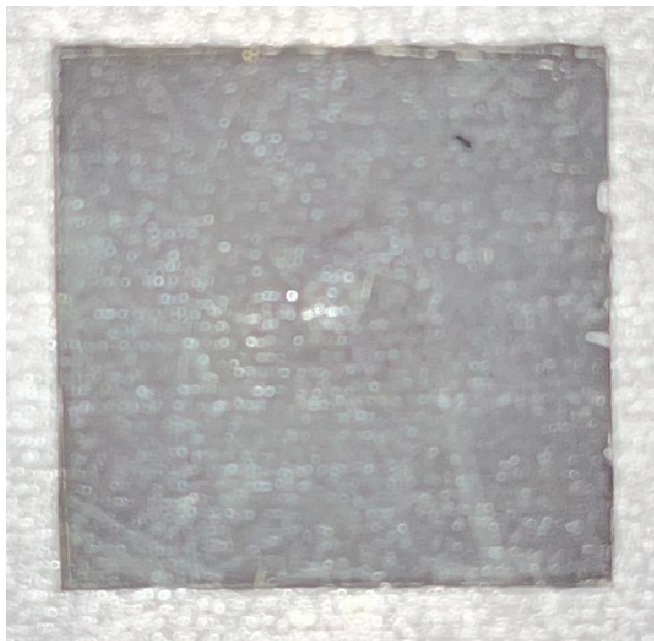

**Figure S3** The photograph of perovskite films in the air with high relative humidity (RH=70~80%). The films are prepared without substrate preheating technology, and then annealed at 150 °C for 10 min.

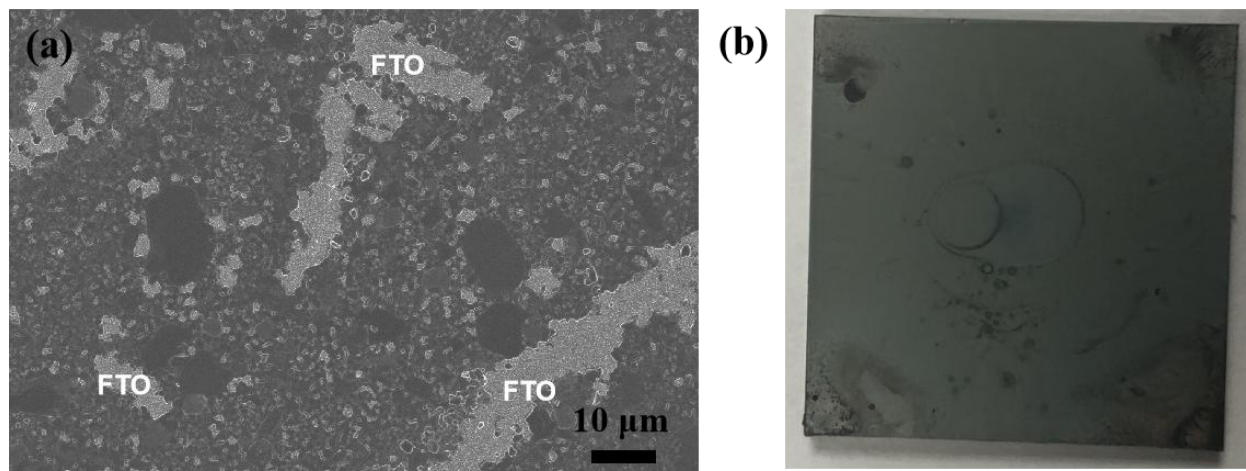

**Figure S4** (a) low magnification SEM image, (b) photograph of perovskite films prepared from the substrate temperature of 175 °C, followed by annealing at 150 °C for 10 min.

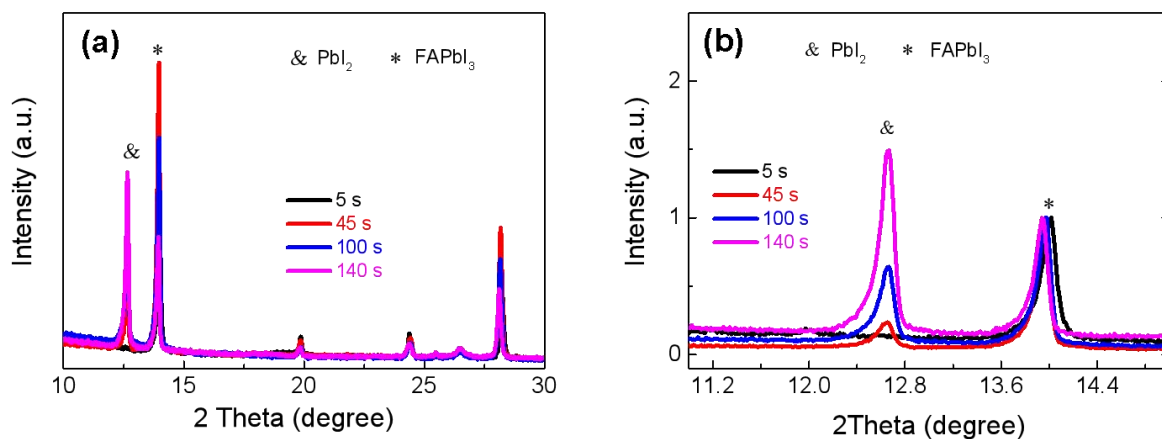

**Figure S5** (a) the unnormalized XRD curves of perovskite films annealed at 300°C for different time; (b) the normalized XRD curves of perovskite films annealed at 300°C for different time.

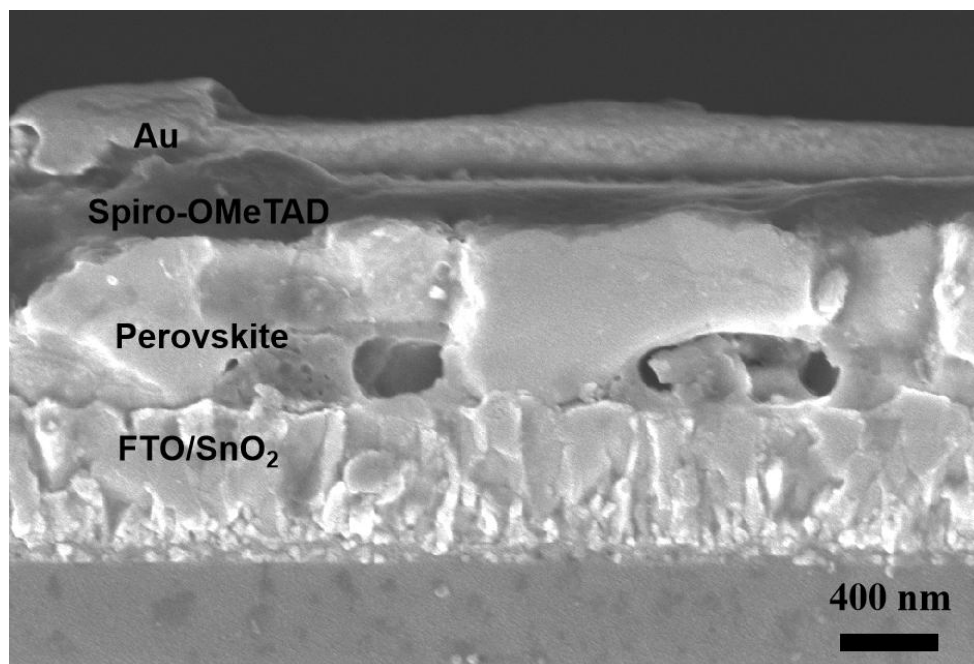

**Figure S6** The cross-sectional SEM image of a PSC, whose light harvest layer of perovskite film is annealed at 150 °C for 10 min in the air with high relative humidity of 70~80%.

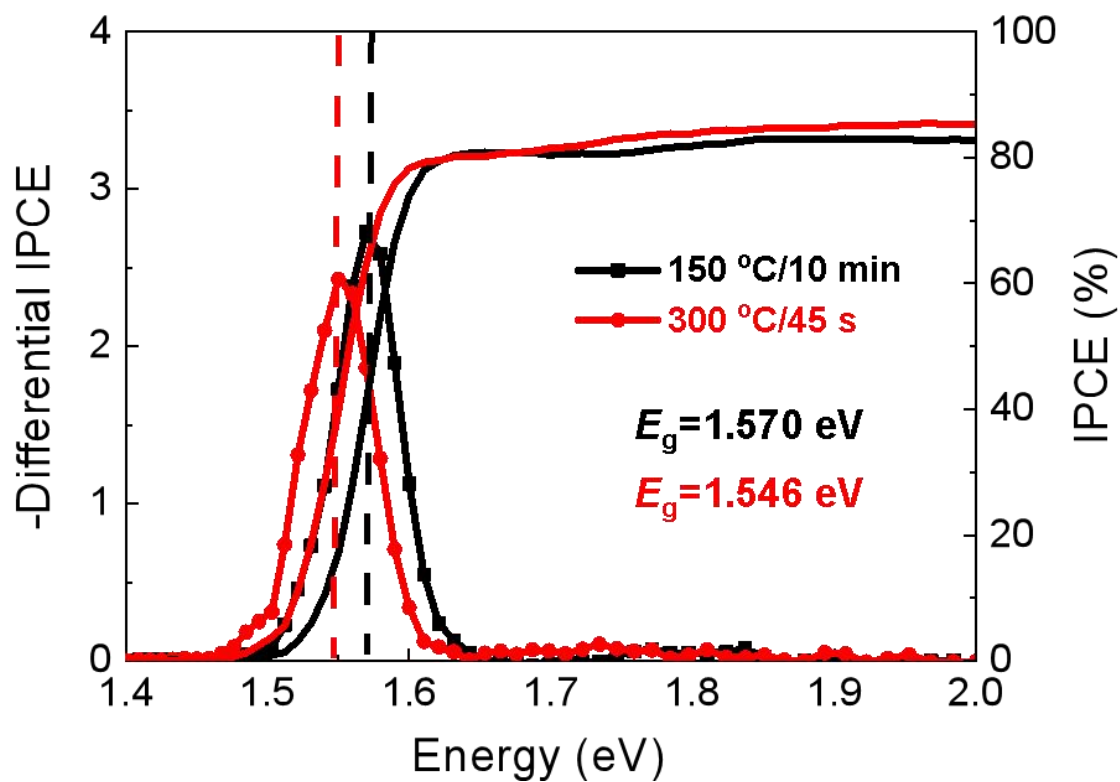

**Figure S7** Calculation of the bandgap ( $E_g$ ) of perovskite films from IPCE spectra. The  $E_g$  can be calculated by the maximum differential value of IPCE.

**Table S1** The fitting results of TRPL spectra.

| Samples       | $\tau_1$ (ns) | $\tau_2$ (ns) | $A_1$ (%) | $A_2$ (%) | $\tau_{ave}$ (ns) |
|---------------|---------------|---------------|-----------|-----------|-------------------|
| 150 °C/10 min | 100.00        | 443.10        | 3.52      | 96.48     | 443.19            |
| 300 °C/45s    | 163.39        | 715.17        | 21.40     | 78.60     | 682.86            |

$$\tau_{ave} = (A_1\tau_1^2 + A_2\tau_2^2)/(A_1\tau_1 + A_2\tau_2)$$

**Table S2** The photovoltaic parameters of champion PSCs annealed at different method.

| Samples           | $V_{oc}$ (V) | $J_{sc}$ (mA cm <sup>-2</sup> ) | FF    | PCE (%) | HI index |
|-------------------|--------------|---------------------------------|-------|---------|----------|
| 150 °C/10 min- RS | 0.955        | 22.67                           | 0.740 | 16.02   |          |
| 150 °C/10 min- FS | 0.939        | 22.66                           | 0.682 | 14.52   | 9.36%    |
| 300 °C/45s- RS    | 1.105        | 23.46                           | 0.766 | 19.86   |          |
| 300 °C/45s- FS    | 1.112        | 23.45                           | 0.745 | 19.41   | 2.27%    |

$$HI=(PCE_{RS}-PCE_{FS})/PCE_{RS}$$
